# Supplementary material for: Knowledge, attitudes and practices regarding rabies and its control among dog owners in Kigali city, Rwanda
Source: PubMed Central journal article supplement (PMC6701806; doi:10.1371/journal.pone.0210044), 2019-08-20
Supplement: pone.0210044.s001.pdf [file pone.0210044.s001.pdf]

## Survey questionnaire

Interview date:...../...../2016

Tel. number: .....

Dog owner ID: Code:.....

### i) Dog owner particulars

1. District.....Sector.....Cell.....Village.....

2. GPS reading: (a) land mark number :.....(b) Longitude.....

(c) Latitude..... (d) Elevations.....

3. Sex: (a) Male  (b) Female

4. Educational level: (a) No formal education,  (b) Primary,  (c) Secondary,

(d) Tertiary

### ii) Dog keeping

5. How long have you been keeping dog (s)? *Tick one*

(a) < 5 years  (b) 5-10 years  (c) >10 years

6. Why do you keep dog (s)? *Tick one*

(a) Security  (b) pet  (c) herding  (d) accidentally

### iii) Knowledge of rabies

7. Have you heard about rabies disease? (a) Yes  (b) No

8. If yes, how did you get information about rabies disease? *Tick as appropriate*

(a) On the radio  (b) Reading of hard or online newspapers, books, etc  (c) Public meeting

(d) Neighbours  (e) Parents  (f) veterinarians  (g) schooling  (h) Other,  specify

9. Do you know susceptible hosts to rabies? (a) Yes  (b) No

10. Which of the following hosts can suffer from rabies? *Tick appropriately*

(a) Dogs  (b) cats  (c) cows  (d) sheep  (e) goat  (f) pigs  (g) rabbits   
(h) People  (i) Jackal  (j) other,  specify....

11. How rabies can be transmitted between dogs and other animals? *Tick as appropriate*

(a) Bite  (b) licking of wound  (c) skin scratch  (d) food  (e) licking of intact skin  (f) other,  specify,

12. How rabies can be transmitted from dogs to humans? *Tick as appropriate*

(a) Bite  (b) licking of wound  (c) licking of intact skin  (d) skin scratch   
(e) Do not know

13. Do you know clinical signs of rabies in dogs? (a) Yes  (b) No

14. Which of the following clinical signs are seen in dogs with rabies? *Tick as appropriate*

(a) Aggressiveness (biting without any provocation)  (b) Profuse salivation  (c) Pica (e.g., sticks, nails, faeces, etc)  (d) Difficulty in swallowing  (e) Roaming over long distances (running for no apparent reason)  (f) Change in sound (e.g., hoarse barking or inability to make sound)  (g) Dropping of the jaw  (h) Other,  specify (i) do not know

15. What is the prognosis for rabies in dogs showing clinical signs? *Tick one*

(a) They can be treated successfully  (b) they always die  (c) do not know

16. What is the prognosis for dog mediated rabies in people showing clinical signs? *Tick one*

(a) They can be treated successfully  , (b) they always die  , (c) do not know

17. What is the most effective method for rabies control in dogs? *Tick one*

- (a) Killing of stray dogs  (b) restriction of dog movements  (c) regular vaccination  
(d) Castration

**(iv) Attitudes towards rabies**

18. If a dog bites a man or an animal, what would you wish to happen to the biting dog if is caught? *Tick one*

- (a) Immediate release if the owner is known and the dog is vaccinated   
(b) Direct killing if the owner and vaccination status are unknown   
(c) Keep the dog for 10 days to see if it is rabid; regardless of its vaccination status

19. If your colleague is bitten by a dog, what can you do before you take him/her to a health care facility? *Tick one*

- (a) Careful wash of the wound with water alone or with soap if available  (b) Covering the wound with dressings and bandages  (c) Apply the salt to the wound  (d) Take the patient to a health care without doing anything  (e) Apply 70 % alcohol to the wound  (f) apply other type antiseptics to the wound  specify.....

20. In your thinking, how best dog-mediated rabies can be controlled in humans? *Tick one*

- (a) Regular vaccination of dogs  (b) Complete restriction of dogs  (c) Education of the public  (d) Killing stray dogs  (e) regular vaccination of people at risk (e.g., veterinarians)  
(f) Post-exposure prophylaxis

**(v) Practices of rabies**

21. Do you bring your dog (s) to vaccination against rabies? (a) Yes  (b) No

22. How old was your dog at first vaccination?

(a) Younger than or three month old  (b) older than three months  (c) do not know

23. How do you proceed to have your dog (s) vaccinated? *Tick one*

(a) Take a dog to a site during campaign for vaccination,  (b) a veterinarian comes at home   
,(c) both approaches , (d) take a dog to a veterinary clinic

24. Who vaccinates your dog (s)? *Tick one*

(a) Private veterinarians  (b) public veterinarians

25. How a veterinarian who vaccinated your dog last time did carry the vaccine? *Tick one*

(a) In a cool box  (b) on ice without cool box (e.g., in a plastic bag)

(c) The vaccine was purchased and carried on ice by “the dog owner” and then administered by  
a veterinarian

26. How much did you pay to have your dog vaccinated last time? *Tick one*

(a) 1- 1, 500 FRW  (b) 1,501-3,000 FRW  (c) 3,001 – 5,000 FRW  (d) 5,001 -  
10,000 FRW  (e) 10,001 – 20,000 FRW  (f) 20,001-30,000 FRW  free of charge

27. What do you think of the vaccination fees? *Tick one*

(a) Too little money  (b) too much money  (c) affordable

28. Why have you not taken your dog (s) to vaccination? “Owners of unvaccinated dogs”- Tick  
*as appropriate*

(a) Lack of information  (b) lack of knowledge of rabies  (c) difficulty in catching dogs  (d) too much vaccination fees  (e) Sites set far during campaigns for vaccination  (f) Negligence

**Thank you for your cooperation!!!!**
